# Supplementary material for: A facile membraneless method for detecting alkali-metal cations using organic electrochemical transistors
Source: Royal Society of Chemistry journal article supplement (doi:10.1039/d4tc03047h), 2024-01-01
Supplement: d4tc03047h1.pdf [file d4tc03047h1.pdf]

## Supporting Information

### **A Facile Membraneless Method for Detecting Alkali-Metal Cations Using Organic Electrochemical Transistors**

Waner He, Yurika Kashino, Naoya Nozaki, Joost Kimpel, Hidetoshi Matsumoto, Yuhei Hayamizu, and Tsuyoshi Michinobu\*

Dr. W. He, Y. Kashino, N. Nozaki, Prof. H. Matsumoto, Prof. Y. Hayamizu, Prof. T. Michinobu  
Department of Materials Science and Engineering, Tokyo Institute of Technology, Ookayama 2-12-1, Meguro-ku, Tokyo 152-8552, Japan  
Email: michinobu.t.aa@m.titech.ac.jp

J. Kimpel  
Department of Chemistry and Chemical Engineering, Chalmers University of Technology, 41296  
Göteborg, Sweden

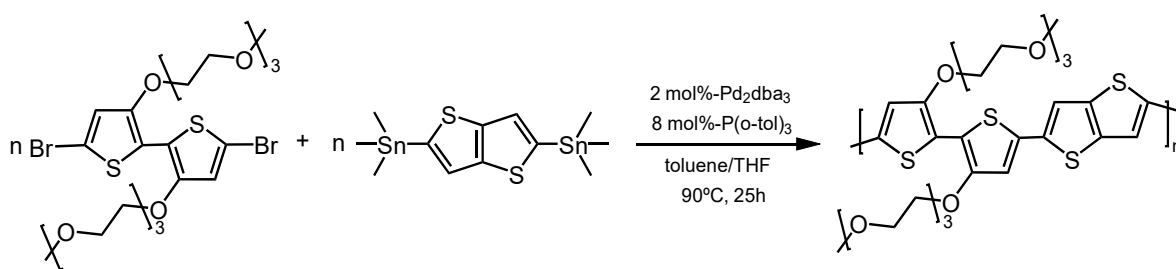

**Scheme S1** The synthesis of the polymer p(g2T-TT).<sup>S1</sup>

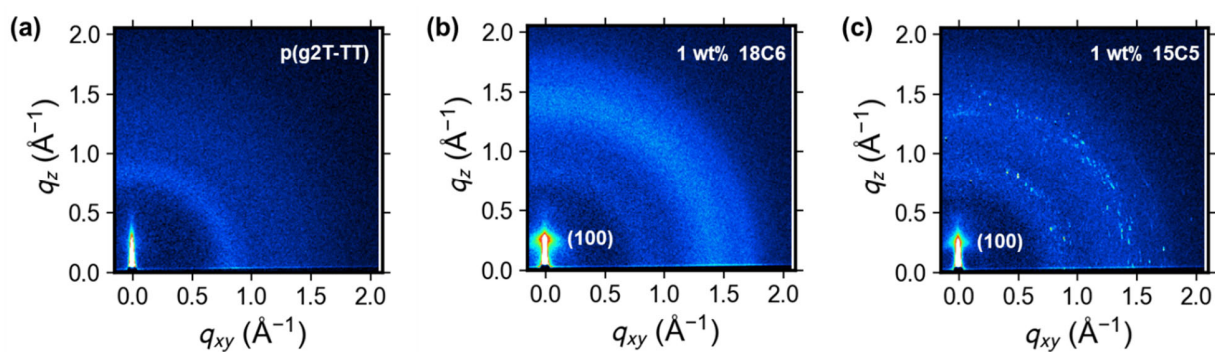

**Fig. S1** Comparison of grazing incidence wide-angle X-ray scattering (GIWAXS) 2D patterns of three polymer thin films without annealing: (a) p(g2T-TT), (b) 1wt% 18C6-mixed p(g2T-TT), and (c) 1wt% 15C5-mixed p(g2T-TT).

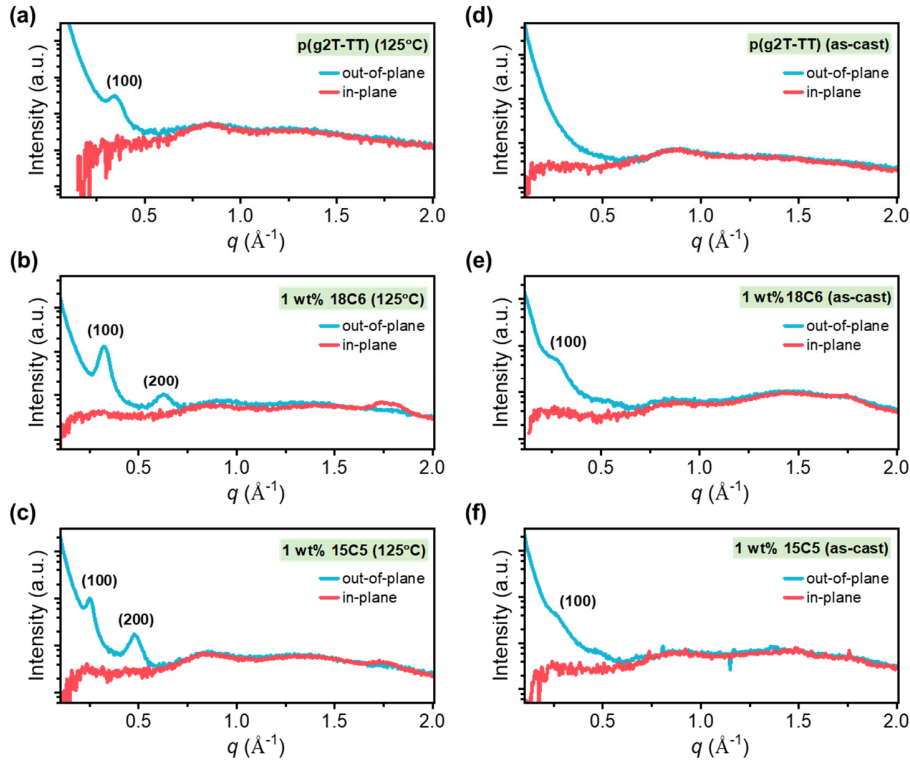

**Fig. S2** The corresponding 1D profiles from 2D GIWAXS patterns ( $-90^{\circ}\pm 10^{\circ}$  for out-of-plane;  $-5^{\circ}\pm 5^{\circ}$  and  $-175^{\circ}\pm 5^{\circ}$  for in-plane) of (a, d) p(g2T-TT), (b, e) 1wt% 18C6-mixed p(g2T-TT) and (c, f) 1wt% 15C5-mixed p(g2T-TT) films (a-c) before annealing or (d-f) after annealing at 125 °C for 10 min.

**Table S1.** Extracted peak values and calculated parameters from 1D GIWAXS profiles

| $T_{\text{annealing}}$<br>(°C) | Materials | lamellar spacing (100) |                                    |                                           |           | lamellar spacing (200) |                                    |                                           |           |
|--------------------------------|-----------|------------------------|------------------------------------|-------------------------------------------|-----------|------------------------|------------------------------------|-------------------------------------------|-----------|
|                                |           | $q$ (Å <sup>-1</sup> ) | $d$ -spacing <sup>[a]</sup><br>(Å) | FWHM <sup>[b]</sup><br>(Å <sup>-1</sup> ) | $L_c$ (Å) | $q$ (Å <sup>-1</sup> ) | $d$ -spacing <sup>[a]</sup><br>(Å) | FWHM <sup>[b]</sup><br>(Å <sup>-1</sup> ) | $L_c$ (Å) |
|                                | p(g2T-TT) | 0.338                  | 18.59                              | 0.10                                      | 56.5      | --                     | --                                 | --                                        | --        |
| 125°C                          | 1wt% 18C6 | 0.323                  | 19.45                              | 0.05                                      | 113.1     | 0.627                  | 10.02                              | 0.07                                      | 80.8      |
|                                | 1wt% 15C5 | 0.252                  | 24.93                              | 0.04                                      | 141.4     | 0.479                  | 13.12                              | 0.07                                      | 80.8      |
|                                | p(g2T-TT) | --                     | --                                 | --                                        | --        | --                     | --                                 | --                                        | --        |
| As-cast                        | 1wt% 18C6 | 0.246                  | 25.54                              | 0.13                                      | 43.5      | --                     | --                                 | --                                        | --        |
|                                | 1wt% 15C5 | 0.258                  | 24.35                              | 0.10                                      | 56.5      | --                     | --                                 | --                                        | --        |

[a]  $d$ -spacing =  $2\pi/q$ ; [b]  $L_c = 2\pi K/\text{FWHM}$  ( $K = 0.9$ ).

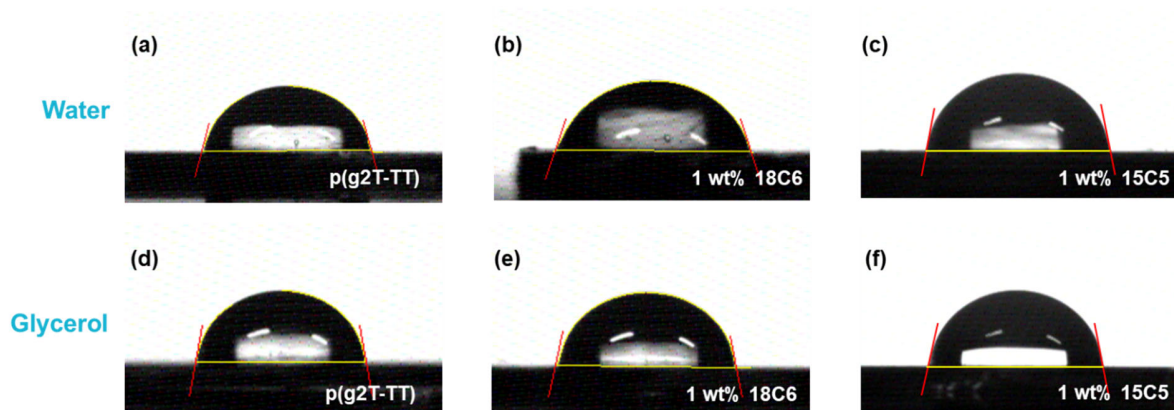

**Fig. S3** Contact angles of polymer thin films on  $\text{Si}^{++}/\text{SiO}_2$  substrate in air: (a, d) p(g2T-TT), (b, e) 1wt% 18C6-mixed p(g2T-TT), and (c, f) 1wt% 15C5-mixed p(g2T-TT).

**Table S2.** Contact angles and surface energy of the polymer thin films with water and glycerol drop

| Materials            | $\theta_{\text{water}} (^{\circ})$ | $\theta_{\text{glycerol}} (^{\circ})$ | $\gamma$ ( $\text{mN m}^{-1}$ ) |
|----------------------|------------------------------------|---------------------------------------|---------------------------------|
| p(g2T-TT)            | 74.1                               | 77.5                                  | 31.2                            |
| 18C6-mixed p(g2T-TT) | 68.8                               | 77.7                                  | 40.4                            |
| 15C5-mixed p(g2T-TT) | 86.5                               | 79.1                                  | 22.4                            |

**Table S3.** Summary of average threshold voltage ( $V_{th}$ ), transconductance ( $g_m$ ), and  $\mu C^*$  value in OECT.

| Materials                                                       | p(2gT-TT)         | 18C6-mixed<br>p(2gT-TT) | 15C5-mixed<br>p(2gT-TT) | p(2gT-TT)         | 18C6-mixed<br>p(2gT-TT) | 15C5-mixed<br>p(2gT-TT) |
|-----------------------------------------------------------------|-------------------|-------------------------|-------------------------|-------------------|-------------------------|-------------------------|
|                                                                 | Na <sup>+</sup>   |                         |                         | K <sup>+</sup>    |                         |                         |
| $V_{th}$ (V)                                                    | $-0.53 \pm 0.067$ | $-0.24 \pm 0.048$       | $-0.11 \pm 0.054$       | $-0.51 \pm 0.065$ | $-0.22 \pm 0.068$       | $-0.069 \pm 0.079$      |
| $g_m$ (mS)                                                      | $0.62 \pm 0.014$  | $0.33 \pm 0.022$        | $0.37 \pm 0.024$        | $0.63 \pm 0.028$  | $0.37 \pm 0.024$        | $0.40 \pm 0.019$        |
| $\mu C^*$ (F cm <sup>-1</sup> V <sup>-1</sup> s <sup>-1</sup> ) | $24.23 \pm 2.21$  | $10.51 \pm 0.92$        | $13.99 \pm 1.69$        | $23.69 \pm 2.36$  | $15.21 \pm 0.55$        | $15.05 \pm 1.17$        |

**Table S4.** Summary of the ion sensitivity, linear range of detection, and limit of detection (LOD) in OECTs

| Active Materials        | Cations         | $I_D$ Sensitivity ( $\mu A \text{ dec}^{-1}$ ) | Linear range (M) | LOD (M)               |
|-------------------------|-----------------|------------------------------------------------|------------------|-----------------------|
| p(2gT-TT)               | Na <sup>+</sup> | 10.63                                          | $10^{-4} \sim 1$ | $1.65 \times 10^{-5}$ |
|                         | K <sup>+</sup>  | 10.45                                          | $10^{-4} \sim 1$ | $3.34 \times 10^{-5}$ |
| 18C6-mixed<br>p(2gT-TT) | Na <sup>+</sup> | 7.84                                           | $10^{-3} \sim 1$ | $4.06 \times 10^{-4}$ |
|                         | K <sup>+</sup>  | 12.46                                          | $10^{-4} \sim 1$ | $6.22 \times 10^{-5}$ |
| 15C5-mixed<br>p(2gT-TT) | Na <sup>+</sup> | 10.3                                           | $10^{-4} \sim 1$ | $1.81 \times 10^{-4}$ |
|                         | K <sup>+</sup>  | 13.9                                           | $10^{-4} \sim 1$ | $9.93 \times 10^{-5}$ |

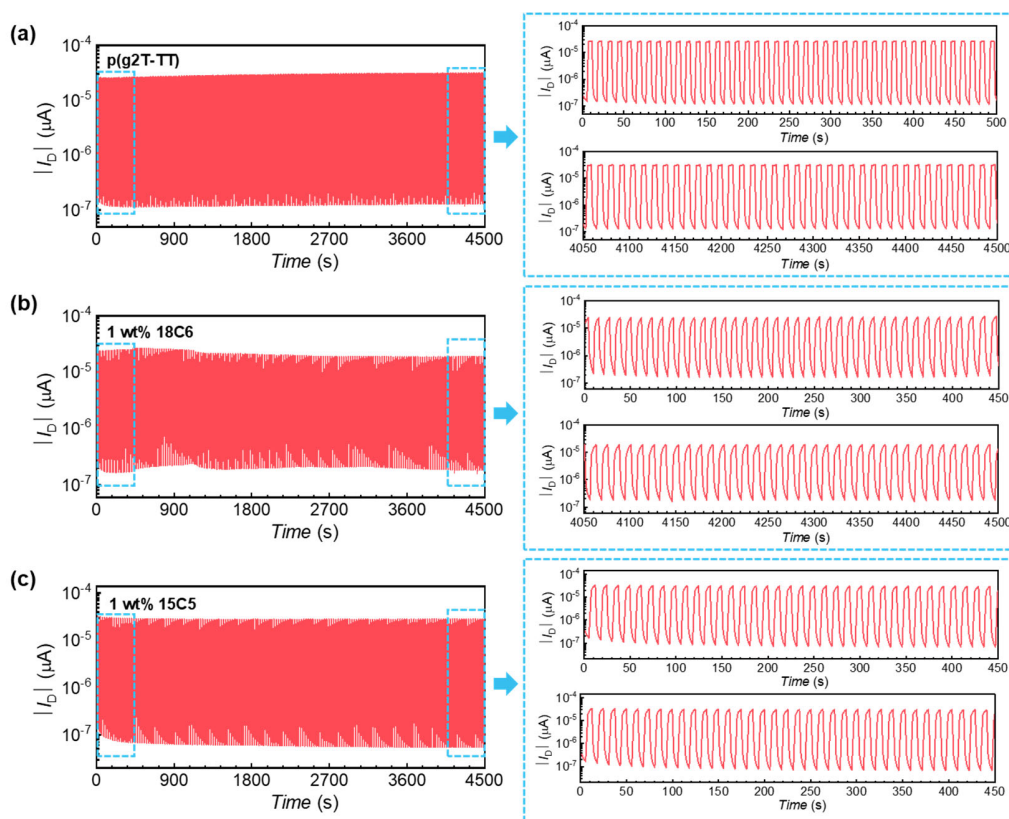

**Fig. S4** Operation stability of drain current for IS-OECTs. Transient response of drain current for  $V_D$  is  $-0.4$  V and square pulse  $V_G$  switching between 0 and  $-0.4$  V with the pulse width of 5 s for 450 cycles in 0.1 M KCl aqueous solution. The right figures show the first 45 cycles (top) and the last 45 cycles (bottom): (a) pristine p(g2T-TT); (b) 18C6-mixed p(g2T-TT), and (c) 15C5-mixed p(g2T-TT).

**Table S5.** Average drain current of “ON” and “OFF” states at first 45 cycles and last 45 cycles in transient response with 0.1 M NaCl or KCl aqueous solutions as the electrolyte under switching gate voltage as 0 V/−0.4 V in OECTs

| Testing Cycles   | Materials             | Na <sup>+</sup> |                      |                      | K <sup>+</sup> |                      |                      |
|------------------|-----------------------|-----------------|----------------------|----------------------|----------------|----------------------|----------------------|
|                  |                       | p(2gT-TT)       | 18C6-mixed p(2gT-TT) | 15C5-mixed p(2gT-TT) | p(2gT-TT)      | 18C6-mixed p(2gT-TT) | 15C5-mixed p(2gT-TT) |
| First 45 Cycles  | $I_{\text{on}}$ (μA)  | -24.3           | -70.2                | -30.7                | -26.1          | -23.3                | -28.5                |
|                  | $I_{\text{off}}$ (μA) | -0.114          | -0.731               | -0.0692              | -0.134         | -0.213               | -0.970               |
| Last 45 Cycles   | $I_{\text{on}}$ (μA)  | -24.5           | -54.4                | -30.9                | -31.6          | -17.5                | -27.0                |
|                  | $I_{\text{off}}$ (μA) | -0.141          | -1.42                | -0.0136              | -0.145         | -0.222               | -0.0629              |
| <b>Retention</b> |                       | <b>100%</b>     | <b>76.3%</b>         | <b>100%</b>          | <b>100%</b>    | <b>74.8%</b>         | <b>97.8%</b>         |

## Reference

- S1 A. Giovannitti, D. T. Sbircea, S. Inal, C. B. Nielsen, E. Bandiello, D. A. Hanifi, M. Sessolo, G. G. Malliaras, I. McCulloch and J. Rivnay, *Proc. Natl. Acad. Sci. U.S.A.*, 2016, **113**, 12017-12022.
